# Supplementary material for: Carbon dot mediated G quadruplex nano-network formation for enhanced DNAzyme activity and easy catalyst reclamation
Source: PubMed Central journal article supplement — RSC Adv. 2019 Dec 17;9(71):41502–10. doi: 10.1039/c9ra08290e (PMC9076458; doi:10.1039/c9ra08290e), 2019-12-17
Supplement: RA-009-C9RA08290E-s001.pdf [file RA-009-C9RA08290E-s001.pdf]

## Supporting Information

### Carbon Dot mediated G-quadruplex Nano-Network Formation for Enhanced DNzyme Activity and Easy Catalyst Reclamation

Sonam Kumari, Saptarshi Mandal and Prolay Das\*

Department of Chemistry, Indian Institute of Technology Patna, India

Table S1: DNA sequences used in the study. All DNA have 5'- phosphate and 3'-OH

|                                                                                                        |
|--------------------------------------------------------------------------------------------------------|
| 1. For CD-G quadruplex network formation <sup>1</sup><br>5-AAATTGGGGTTGGGGTATTC-3'                     |
| 2. For intramolecular CD- G quadruplex formation <sup>2</sup><br>5' AAAAAGGTGGTGGTGGTTGTGGTGGTGGTGG 3' |
| 3. Control non G- rich sequence <sup>3</sup><br>5' TCGGATAGTGCGGCTGTTGACTGA 3'                         |

1. B. Tuesuwan, J. T. Kern, P. W. Thomas, M. Rodriguez, J. Li, W. M. David and S. M. Kerwin, *Biochemistry*, 2008, **47**, 1896-1909.

2. a. Haq, I.; Trent, J.O.; Chowdhry, B.Z.; Jenkins, T.C. Intercalative G-Tetraplex Stabilization of Telomeric DNA by a Cationic Porphyrin. *J. Am. Chem. Soc.* **1999**, *121*, 1768-1779.

b. Fan, X., Sun, L., Wu, Y., Zhang, L., & Yang, Z. (2016). Bioactivity of 2'-deoxyinosine-incorporated aptamer AS1411. *Scientific reports*, 2016, *6*, 25799.

3. Kumari, S., Solanki, A., Mandal, S., Subramanyam, D., & Das, P., Creation of Linear Carbon Dot Array with Improved Optical Properties through Controlled Covalent Conjugation with DNA. *Bioconjugate chemistry*, 2018, *29*(5), 1500-1504.

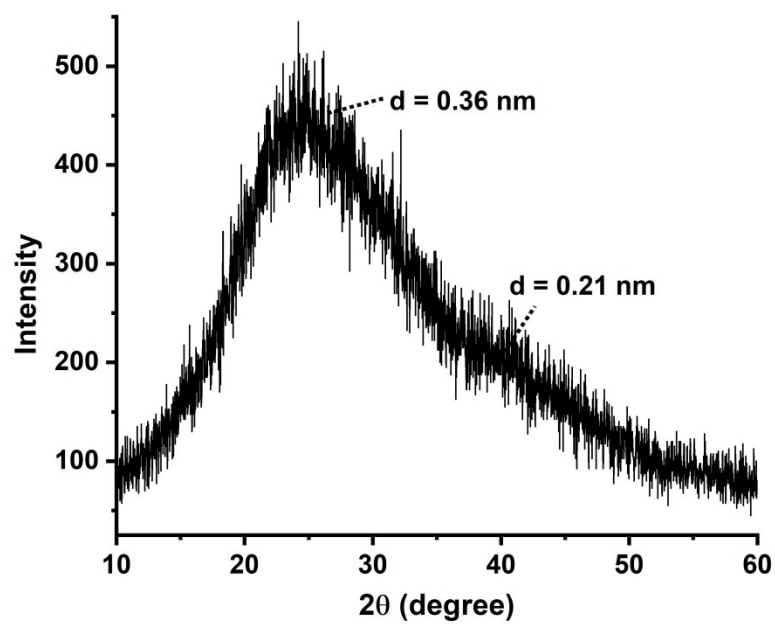

**Figure S1: Powdered XRD of CD**

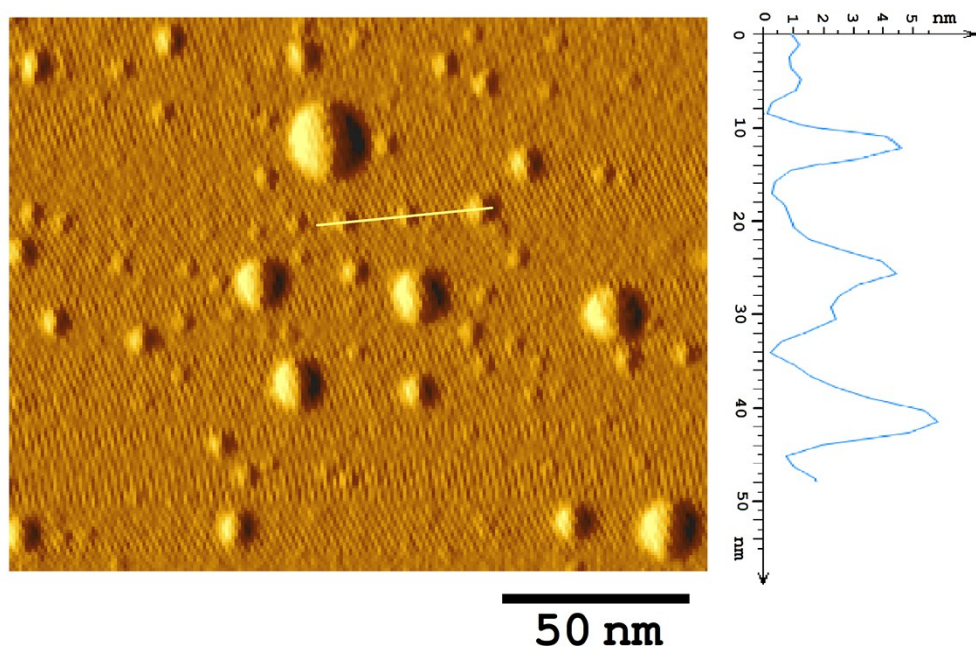

**Figure S2: AFM image of CD**

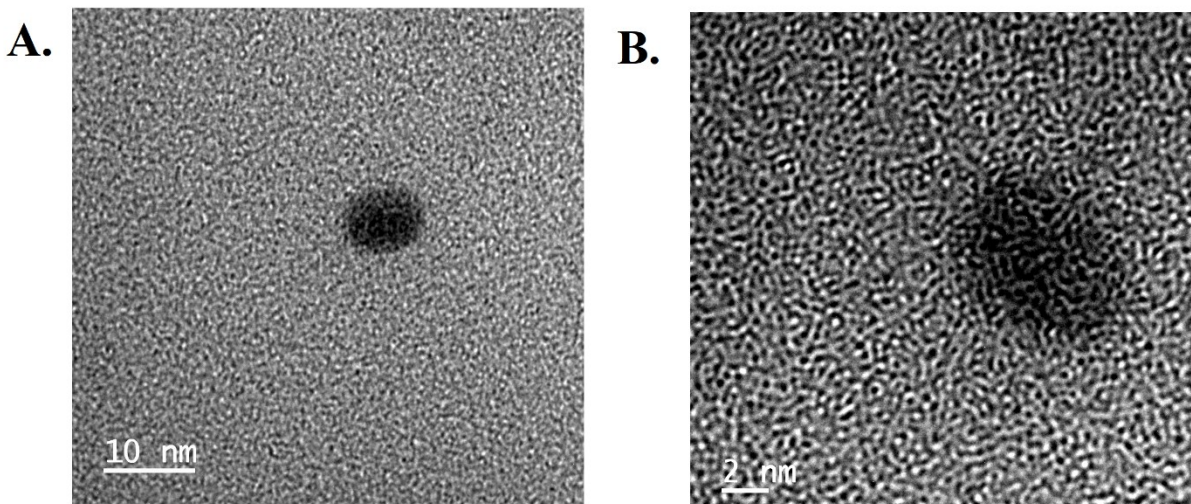

**Figure S3:** TEM images of CD

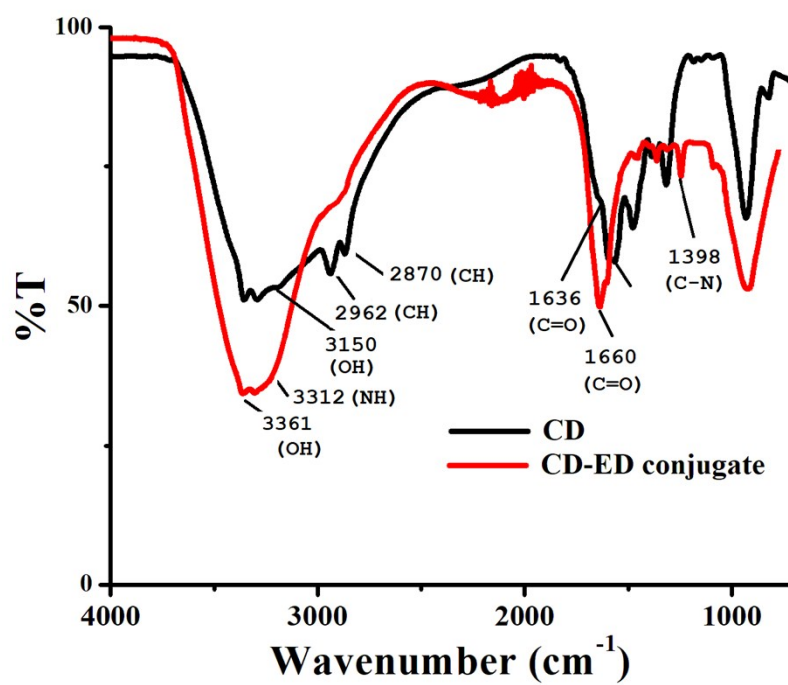

**Figure S4:** FTIR spectra of CD before and after conjugation with ED

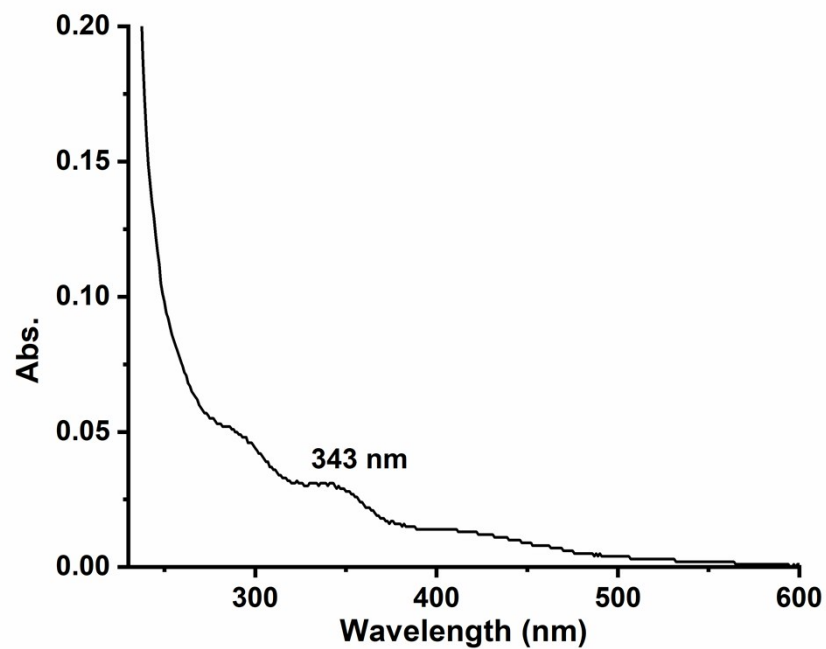

Figure S5: UV-Vis spectra of CD

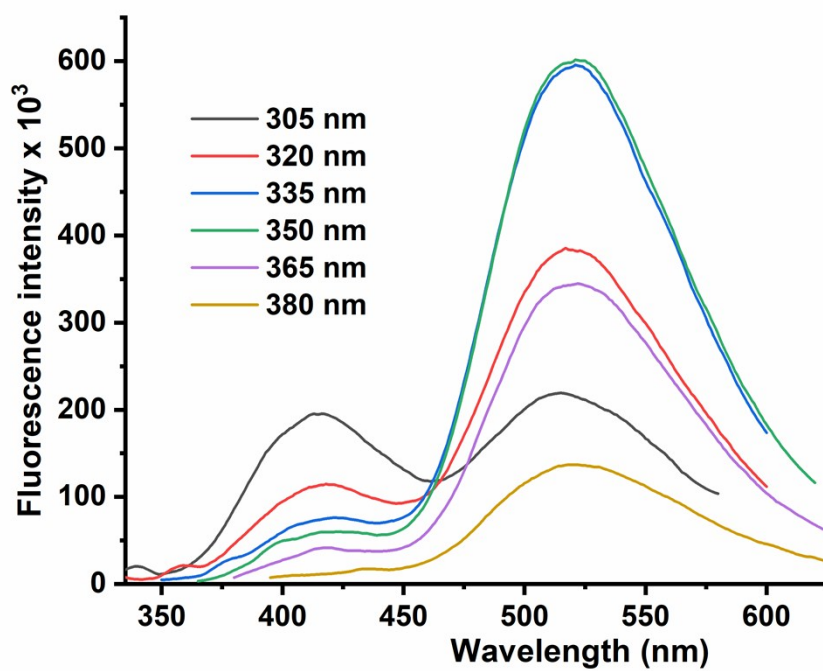

Figure S6: Steady state of CD when excited with wavelength 308 to 350 nm.

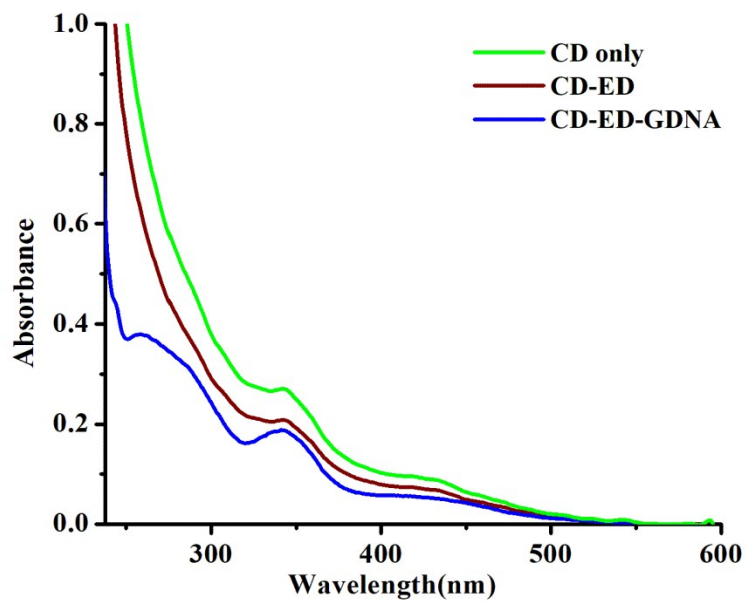

**Figure S7:** UV-Vis spectra of CD, CD-ED conjugate and CD-DNA conjugate

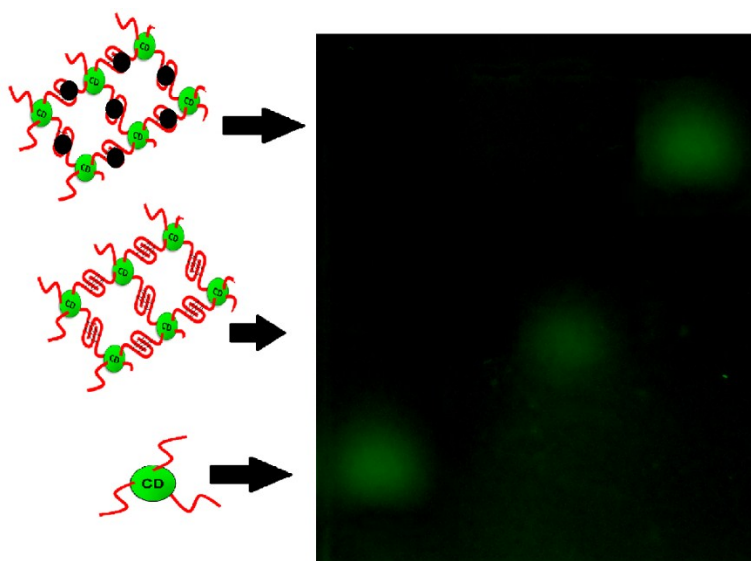

**Figure S8:** Agarose gel electrophoresis showing restricted mobility of CD-G quadruplex network after Hemin complexation. Black sphere in top network depicts Hemin

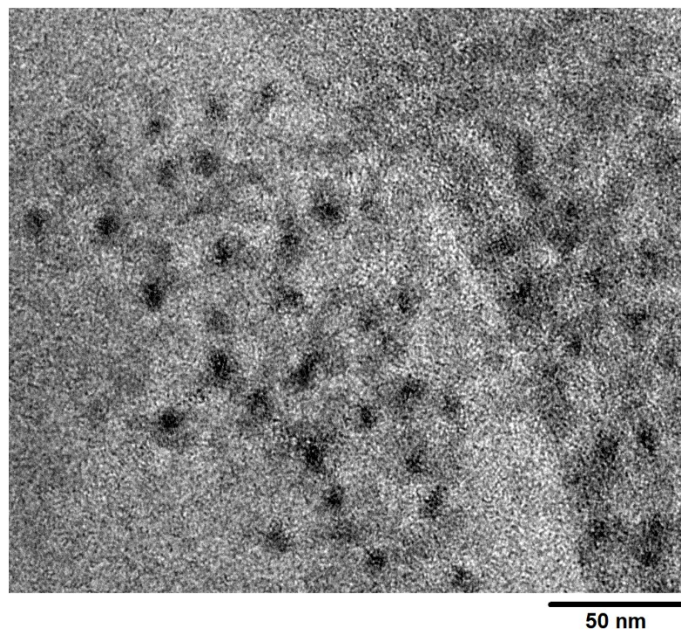

**Figure S9:** TEM image of CD-G-quadruplex network

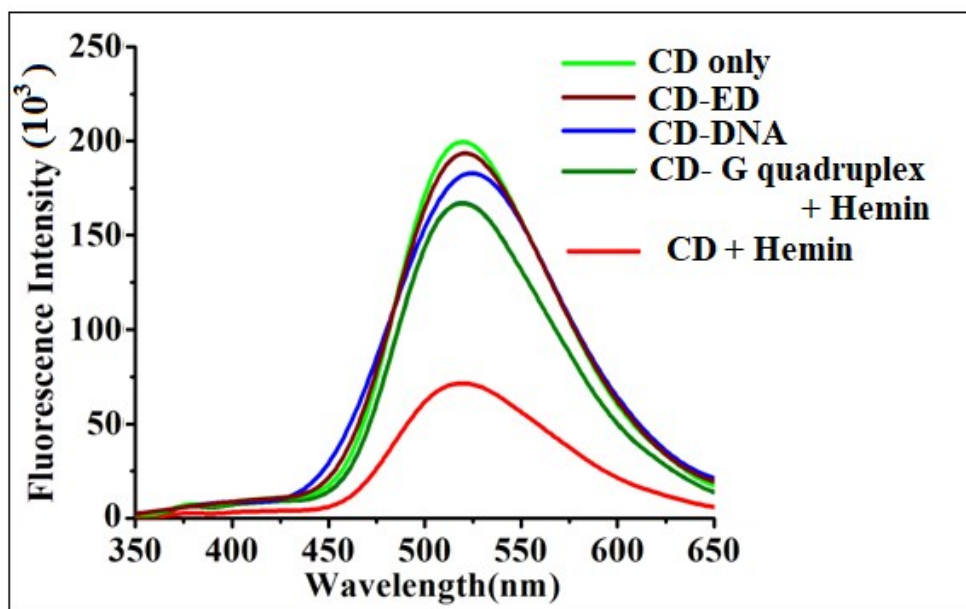

**Figure S10:** Steady State Spectra (excitation at 330nm) of CD, CD-DNA conjugate and CD-G quadruplex-Hemin nanonetwork. (The concentration of DNA and hemin was maintained at 1:1 at 2 $\mu$ M)

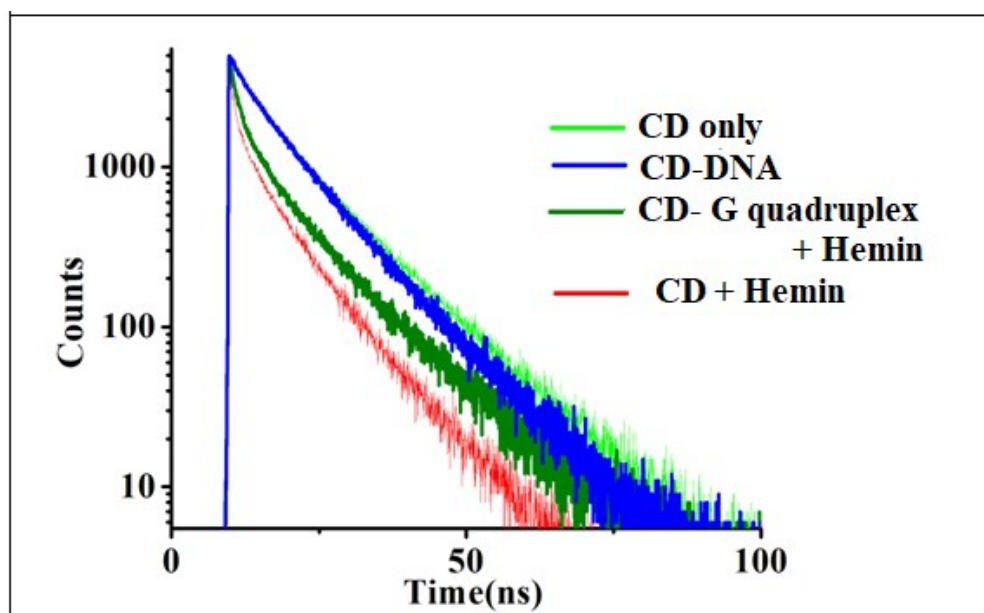

**Figure S11:** Fluorescence Lifetime spectra of CD, CD-DNA conjugate and CD-G quadruplex-Hemin nanonetwork. (The concentration of DNA and hemin was maintained at 1:1 at 2 $\mu$ M)

| Sample                | $\tau_1$ (ns) | Relative % | $\tau_2$ (ns) | Relative % | $\tau_3$ (ns) | Relative % | $\chi^2$ | Average Lifetime (ns) |
|-----------------------|---------------|------------|---------------|------------|---------------|------------|----------|-----------------------|
| CD                    | 0.58          | 2.61       | 4.31          | 20.47      | 10.01         | 76.93      | 1.056    | 8.59809               |
| CD-ED-ssDNA           | 0.45          | 4.39       | 2.45          | 27.28      | 11.53         | 68.33      | 1.39     | 8.56656               |
| CD-ED-Hemin           | 0.18          | 9.12       | 2.42          | 30.28      | 10.3          | 60.6       | 1.212    | 6.99099               |
| CD-G Quadruplex-Hemin | 0.55          | 2.65       | 4.31          | 20.49      | 10.11         | 76.87      | 1.056    | 8.66925               |

Table S2: Data for Fluorescence lifetime study

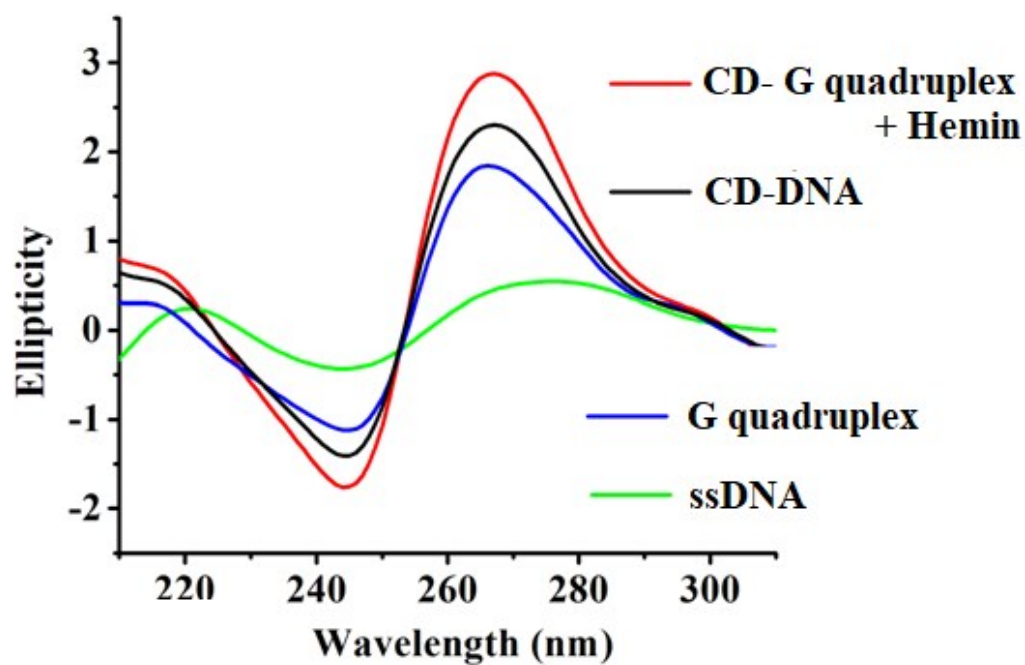

**Fig. S12:** Circular Dichroism spectra of CD, CD-DNA conjugate and CD-G quadruplex-Hemin nanonetwork. (The concentration of DNA and Hemin was maintained at 1:1 at 2 $\mu$ M)

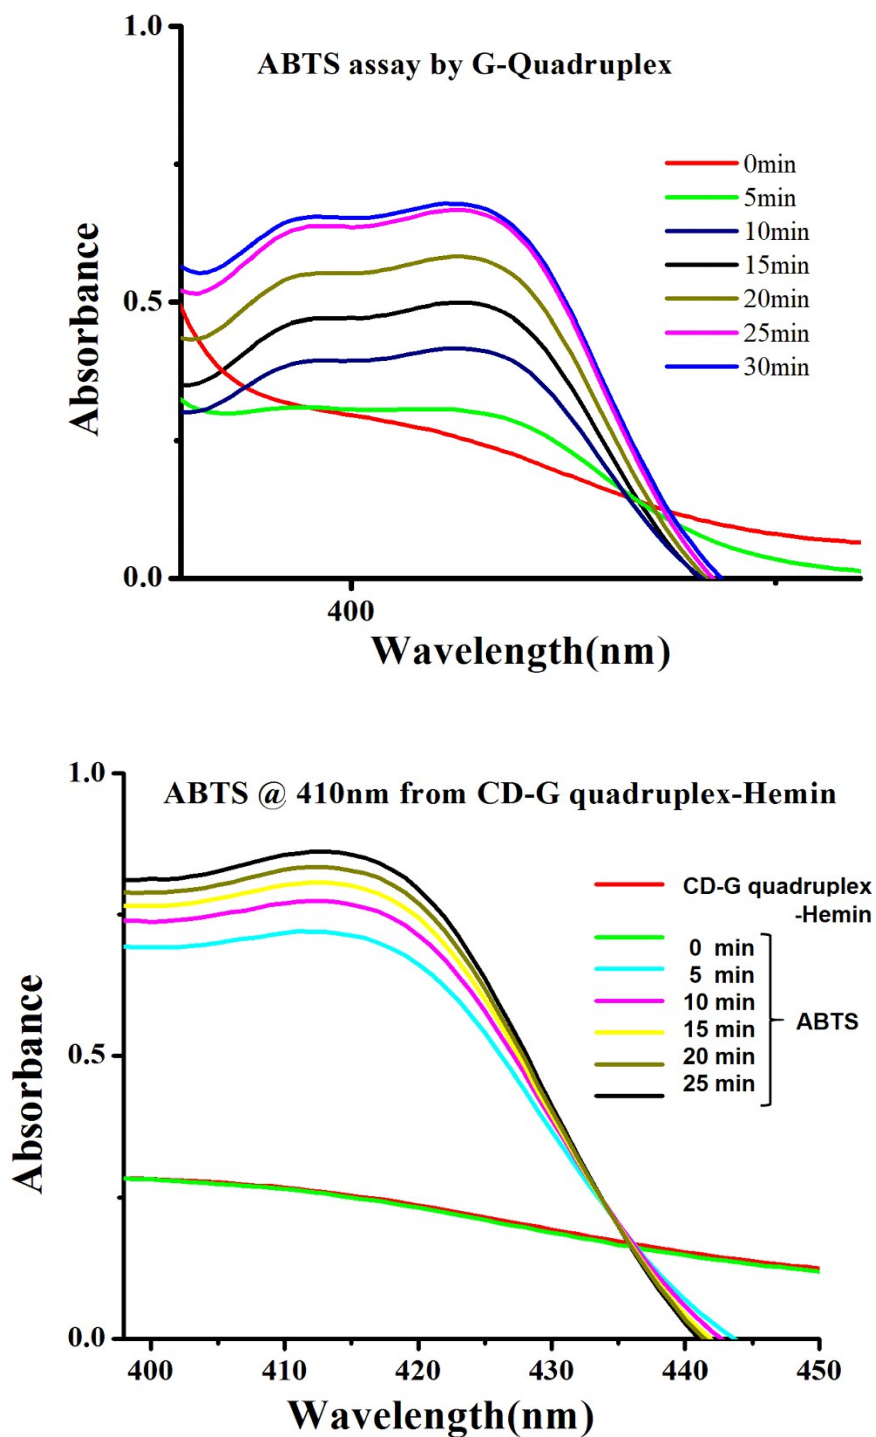

**Figure S13:** UV spectrophotometric scan for reaction of ABTS in presence of Hydrogen peroxide with control G-quadruplex-Hemin complex (top) and CD-G quadruplex-Hemin Nanonetwork (bottom). (Concentration of DNA is maintained at  $2\mu\text{M}$ , ABTS and  $\text{H}_2\text{O}_2$  at  $100\mu\text{M}$ ).

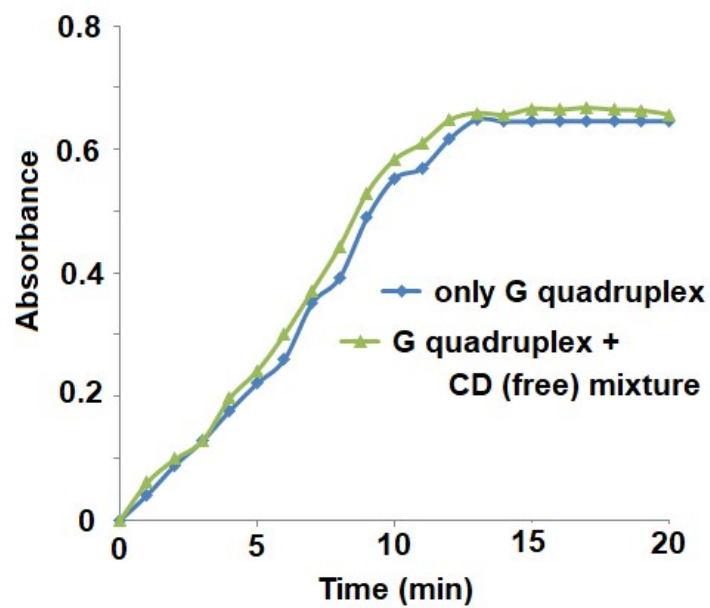

**Figure S14:** Comparison of peroxidase activity of G quadruplex-Hemin and G quadruplex-Hemin mixed with free CD without any covalent conjugation using ABTS reaction (average of 3 points)

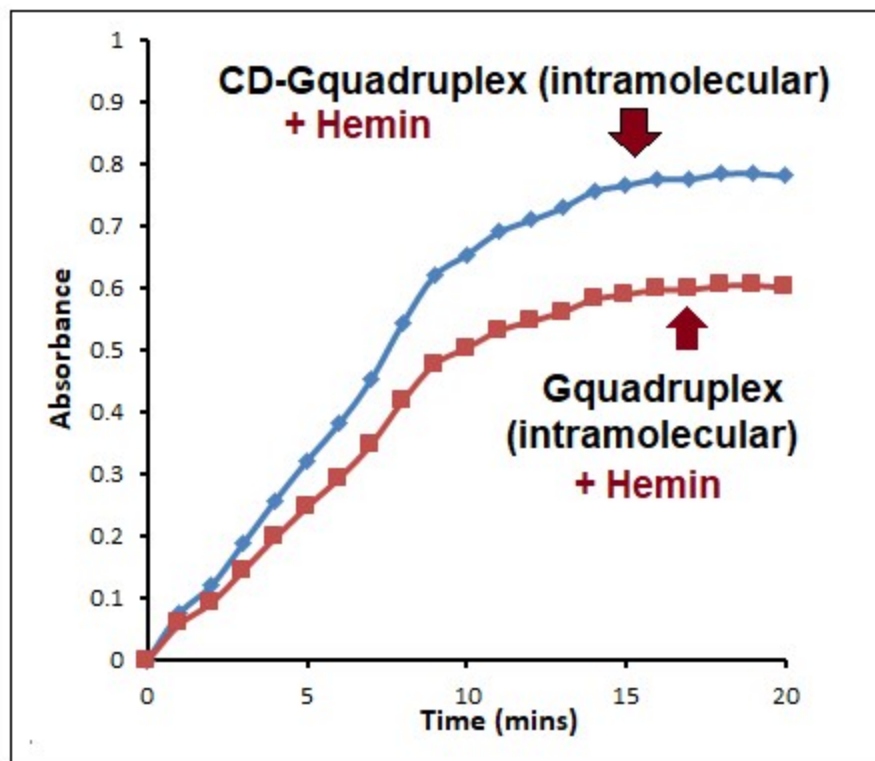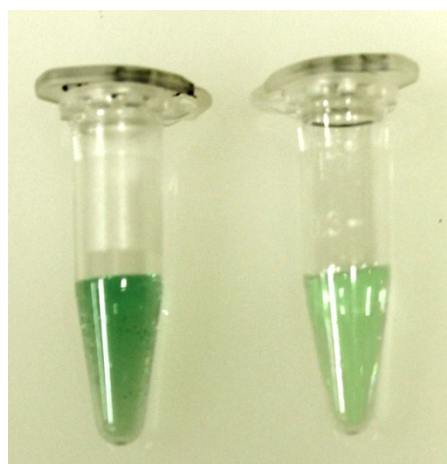

**Figure S15:** Comparison of peroxidase activity of intramolecular G quadruplex-Hemin and CD- intramolecular G quadruplex-Hemin using ABTS reaction (average of 3 points) (top). (Concentration of DNA is maintained at  $2\mu\text{M}$ , ABTS and  $\text{H}_2\text{O}_2$  at  $100\mu\text{M}$ ). Digital image of ABTS reaction of the same solution after 15 min ABTS reaction (left: CD-intramolecular G quadruplex, right: only intramolecular G quadruplex)

**Table S3:** ITC revelations of G quadruplex +Hemin and CD-G quadruplex network +Hemin.

| Sample                | No of binding sites | $K_{1:1}$ ( $M^{-1}$ ) | $\Delta G^0$ (kcal/mol) |
|-----------------------|---------------------|------------------------|-------------------------|
| G quadruplex +hemin   | 0.93                | $6.05 \times 10^4$     | -6.52                   |
| CD-G quadruplex+hemin | 1.64                | $4.54 \times 10^5$     | -7.71                   |

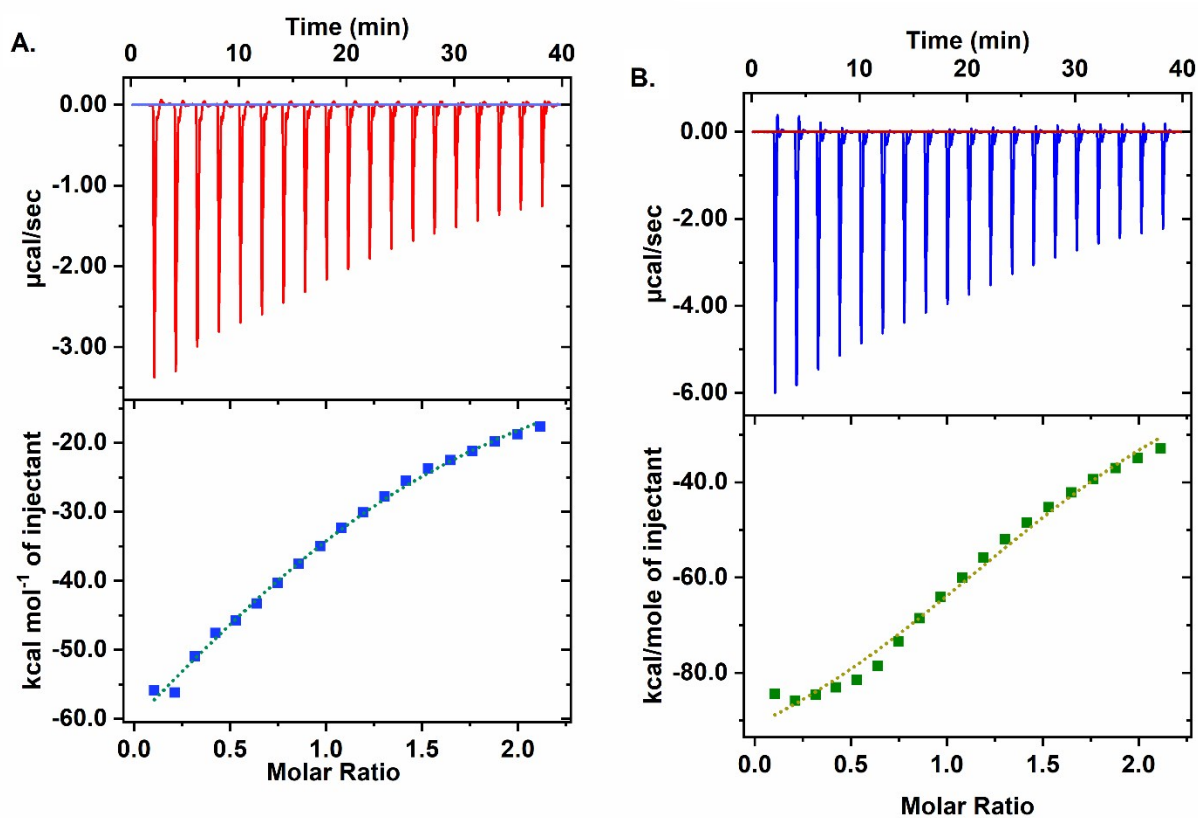

**Figure S16:** ITC data revealing the higher binding constant of Hemin with the CD-intramolecular G quadruplex. A. Intramolecular G quadruplex + Hemin B. CD-intramolecular G-quadruplex +Hemin.

**Table S4:** ITC revelations of intramolecular G quadruplex +Hemin and CD-intramolecular G quadruplex + Hemin (no network).

| Sample                 | No of binding sites | $k_{1:1}$ ( $M^{-1}$ ) | $\Delta G^0$ (kcal/mol) |
|------------------------|---------------------|------------------------|-------------------------|
| G quadruplex + Hemin   | 1.18                | $5.02 \times 10^4$     | -5.55                   |
| CD-G quadruplex+ Hemin | 1.69                | $1.10 \times 10^5$     | -6.87                   |

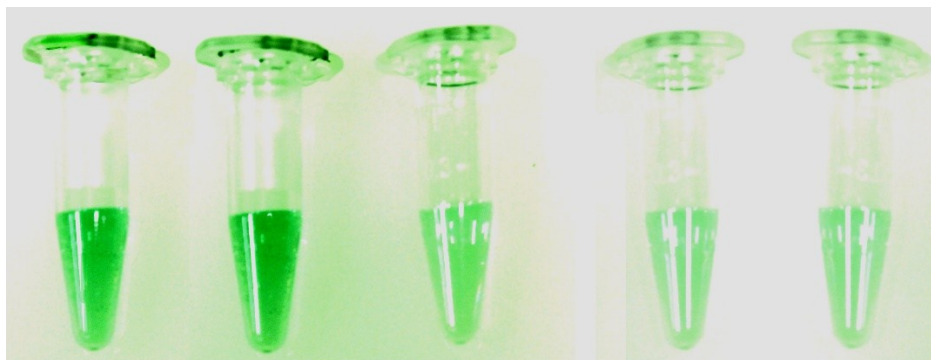

**Figure S17:** ABTS assay results with recovered DNase upto five cycles.
